# Supplementary material
Source: PubMed Central journal article supplement (PMC6648319)
Supplement: ao9b00312_si_001.pdf [file ao9b00312_si_001.pdf]

***Supporting Information for***  
**A novel Colorimetric Method for Simultaneous Detection and**  
**Identification of Multi-Metal Ions in Water: Sensitivity,**  
**Selectivity and Recognition Mechanism**

Linfeng Chen<sup>†</sup>, Xike Tian<sup>†,\*</sup>, Dasha Xia<sup>‡</sup>, Yulun Nie<sup>†</sup>, Liqiang Lu<sup>†</sup>, Chao Yang<sup>†</sup> and Zhaoxin Zhou<sup>†</sup>

<sup>†</sup> Faculty of Materials Science and Chemistry, China University of Geosciences, Wuhan 430074, China

<sup>‡</sup> School of Environmental and Chemical Engineering, Jiangsu University of Science and Technology, Zhenjiang 212003, China

Corresponding author: Xike Tian([xktian@cug.edu.cn](mailto:xktian@cug.edu.cn))

**Determination of association constant (K<sub>a</sub>)**

The association constant of the Tpy-QL and Tpy-BZ to metal ions were determined by the Benesi-Hildebrand analysis method. The UV-Vis spectra was recorded in 100% water solution in 10 mm cell and the absorption intensities of the probe meet the following formula:[1, 2]

$$\frac{1}{A - A_0} = \frac{1}{K_a(A_{\max} - A_0)[M^{n+}]^x} + \frac{1}{A_{\max} - A_0}$$

Where A<sub>0</sub> is the absorbance of free probe, A<sub>max</sub> is the saturation absorbance of the Tpy-QL after adding metal ions, and A is the absorbance at different concentrations of metal ions (For Tpy-QL, absorbance intensity is obtained at 280 nm for Hg<sup>2+</sup>, 520 nm for Co<sup>2+</sup>, 607 nm for Fe<sup>2+</sup>, and 598 nm for Fe<sup>3+</sup>. For Tpy-BZ, absorbance intensity is obtained at 288 nm for Hg<sup>2+</sup>, 520 nm for Co<sup>2+</sup>, 637 nm for Fe<sup>2+</sup>, and 630 nm for Fe<sup>3+</sup>), K<sub>a</sub> is the association constant, which is obtained by dividing the slope of the binding curve by the intercept.

**Products characterization data**

**BZ:**  $^1\text{H}$  NMR (400 MHz,  $d_6$ -DMSO),  $\delta$  (TMS, ppm): 8.48 (d, 1H), 8.36 (d, 1H), 7.92 (t, 1H), 7.83 (t, 1H), 4.80 (m, 2H), 3.32 (s, 3H) and 1.48 (t, 3H). HRMS ( $m/z$ ) calcd for  $\text{C}_{10}\text{H}_{12}\text{NS}$   $[\text{M-I}]^+$  178.06788, found, 178.06891.

**QL:**  $^1\text{H}$  NMR (400 MHz,  $d_6$ -DMSO),  $\delta$  (TMS, ppm): 9.11 (d, 1H), 8.63 (d, 1H), 8.43 (d, 1H), 8.27 (d, 1H), 8.14 (d, 1H), 8.02 (d, 1H), 5.03 (m, 2H), 3.12 (s, 3H) and 1.56 (t, 3H). HRMS ( $m/z$ ) calcd for  $\text{C}_{12}\text{H}_{14}\text{N}$   $[\text{M-I}]^+$  172.24688, found, 172.24639.

**Tpy-BZ:**  $^1\text{H}$  NMR (400 MHz,  $d_6$ -DMSO),  $\delta$  (TMS, ppm): 9.00 (s, 2H), 8.82 (d, 2H), 8.69 (d, 2H), 8.60 (m, 1H), 8.53 (d, 2H), 8.45 (m, 1H), 8.10 (m, 2H), 7.94 (m, 1H), 7.87 (m, 1H), 7.60 (m, 2H), 5.17 (m, 2H) and 1.55 (m, 3H). HRMS ( $m/z$ ) calcd for  $\text{C}_{26}\text{H}_{21}\text{N}_4\text{S}$   $[\text{M-I}]^+$  421.14814, found, 421.14941.

**Tpy-QL:**  $^1\text{H}$  NMR (400 MHz,  $d_6$ -DMSO),  $\delta$  (TMS, ppm): 9.26 (d, 1H), 8.85 (s, 2H), 8.82 (t, 2H), 8.71 (t, 4H), 8.47 (d, 2H), 8.36 (d, 2H), 8.30 (m, 1H), 8.10 (m, 2H), 7.59 (m, 2H), 5.34 (m, 2H), 1.65 (t, 3H). HRMS ( $m/z$ ) calcd for  $\text{C}_{28}\text{H}_{23}\text{N}_4$   $[\text{M-I}]^+$  415.19172, found, 415.19194.

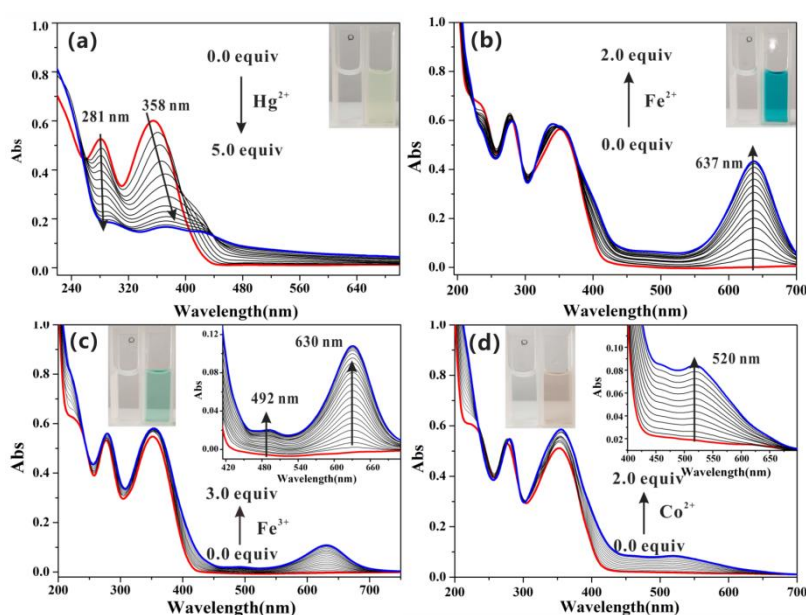

**Figure S1.** UV/Vis titrations spectra of Tpy-BZ (10  $\mu\text{M}$ ) in water at pH 7.0 in the presence of various concentration of (a)  $\text{Hg}^{2+}$  (b)  $\text{Fe}^{2+}$  (c)  $\text{Fe}^{3+}$  (d)  $\text{Co}^{2+}$ . The red line represents the spectrum of free Tpy-QL in water, blue line represents the spectrum after reaction saturation. The inset photographs were taken after the Tpy-BZ and metal ions were completely reacted.

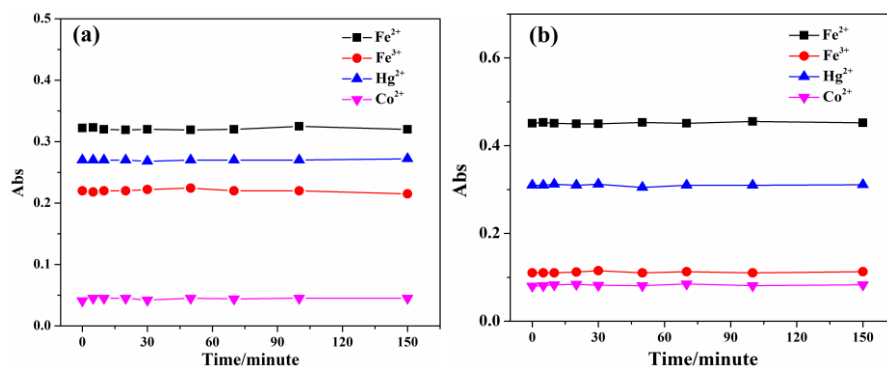

**Figure S2.** The stability of (a)Tpy-QL and (b)Tpy-BZ in aqueous solution after the addition of 3 equiv. of metal ions. (pH =7.0, Ex: 370 nm).

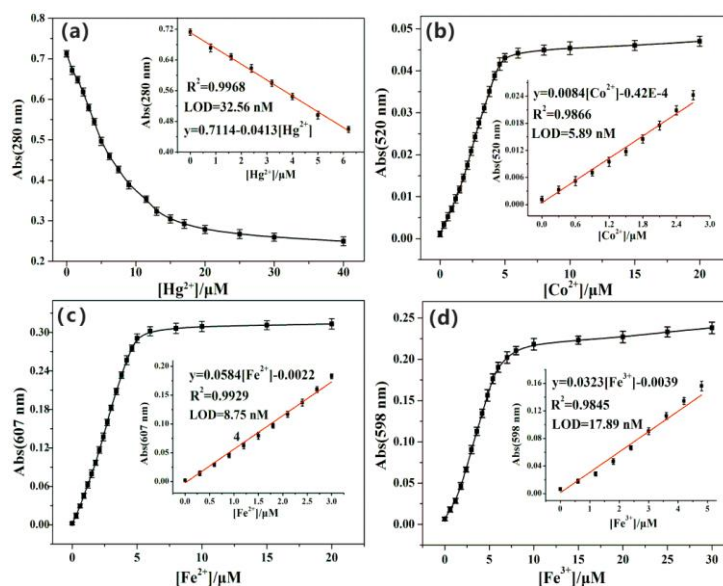

**Figure S3.** Absorbance intensity of Tpy-QL (10  $\mu\text{M}$ ) against the different concentrations of (a)  $\text{Hg}^{2+}$  (b)  $\text{Co}^{2+}$  (c)  $\text{Fe}^{2+}$  (d)  $\text{Fe}^{3+}$ . Inset: the linear relationship between absorbance intensity and (a)  $\text{Hg}^{2+}$  (b)  $\text{Co}^{2+}$  (c)  $\text{Fe}^{2+}$  (d)  $\text{Fe}^{3+}$  concentration.

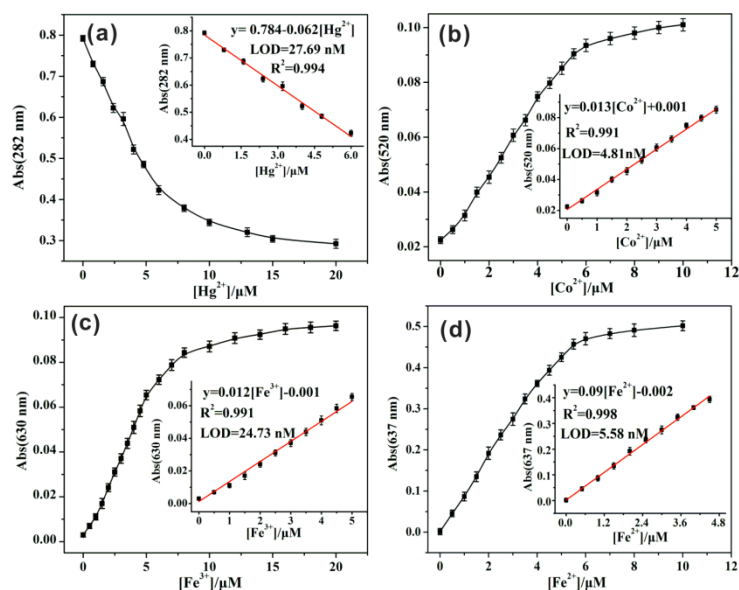

**Figure S4.** Absorbance intensity of Tpy-BZ (10  $\mu\text{M}$ ) against the different concentrations of (a)  $\text{Hg}^{2+}$  (b)  $\text{Co}^{2+}$  (c)  $\text{Fe}^{3+}$  (d)  $\text{Fe}^{2+}$ . Inset: the linear relationship between absorbance intensity and (a)  $\text{Hg}^{2+}$  (b)  $\text{Co}^{2+}$  (c)  $\text{Fe}^{3+}$  (d)  $\text{Fe}^{2+}$  concentration.

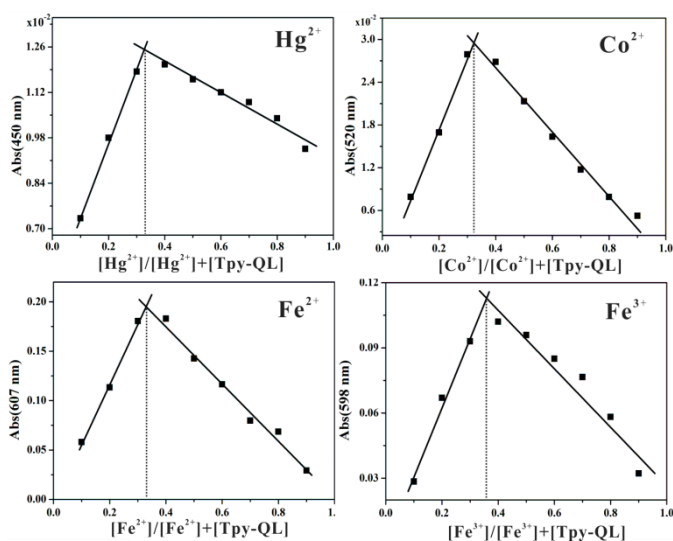

**Figure S5.** Job's plot of Tpy-QL with  $\text{Hg}^{2+}$ ,  $\text{Co}^{2+}$ ,  $\text{Fe}^{2+}$  and  $\text{Fe}^{3+}$  in 100% water solution (pH=7.0) (Total [Tpy-QL] + [metal ions] = 10  $\mu\text{M}$ ).

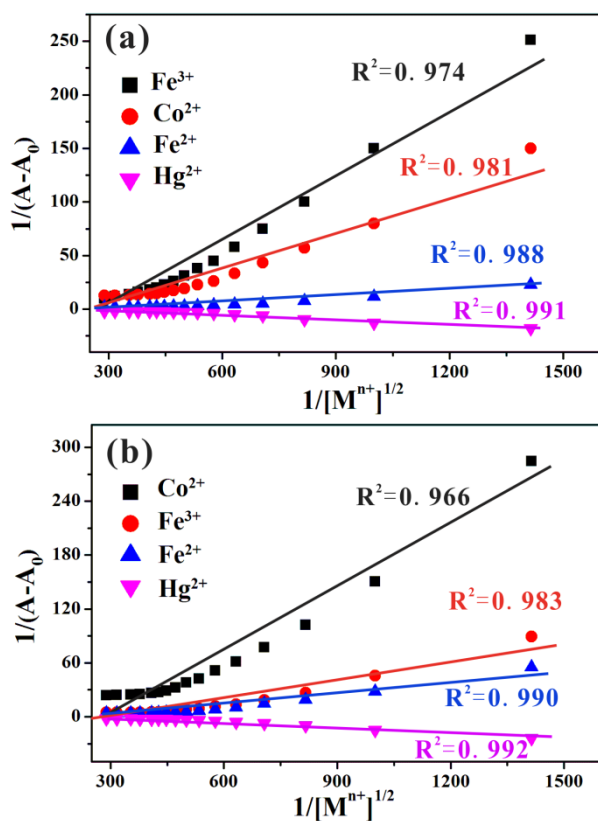

**Figure S6.** The Benesi-Hildebrand plot of (a) Tpy-QL and (b) Tpy-BZ with  $\text{Hg}^{2+}$ ,  $\text{Co}^{2+}$ ,  $\text{Fe}^{2+}$  and  $\text{Fe}^{3+}$ .  $A_0$  is the absorbance intensity of free probe and  $A$  is the absorbance intensity at different concentrations of metal ions.

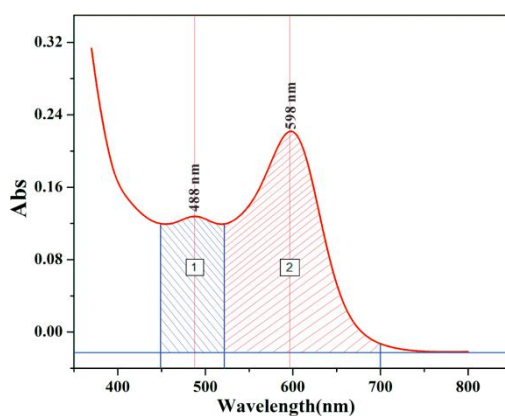

**Figure S7.** Calculation of the area of UV absorption peaks at 488 nm ( $S_{488}$ ) and at 598 nm ( $S_{598}$ ). The  $S_{488}$  is calculated from 450 nm to 520 nm, and the  $S_{598}$  is calculated from 520 nm to 700 nm.

### Tpy-QL-Fe<sup>2+</sup>

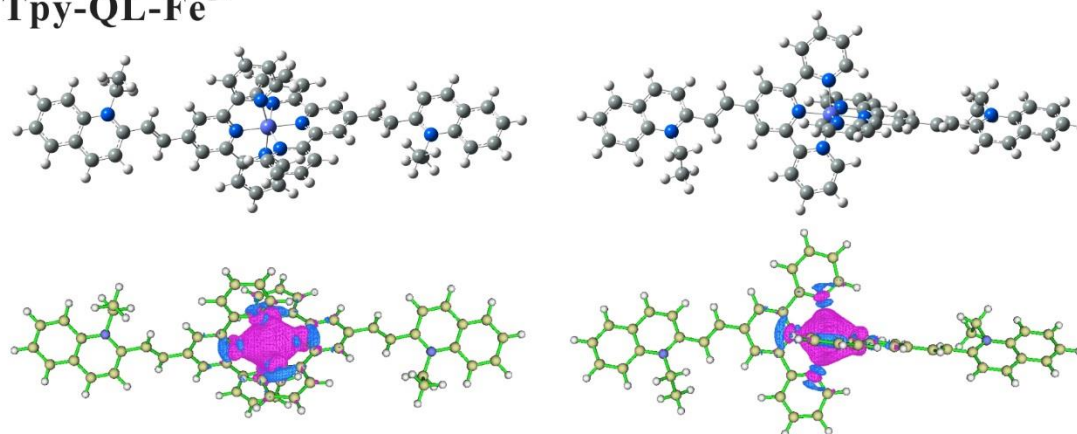

### Tpy-QL-Co<sup>2+</sup>

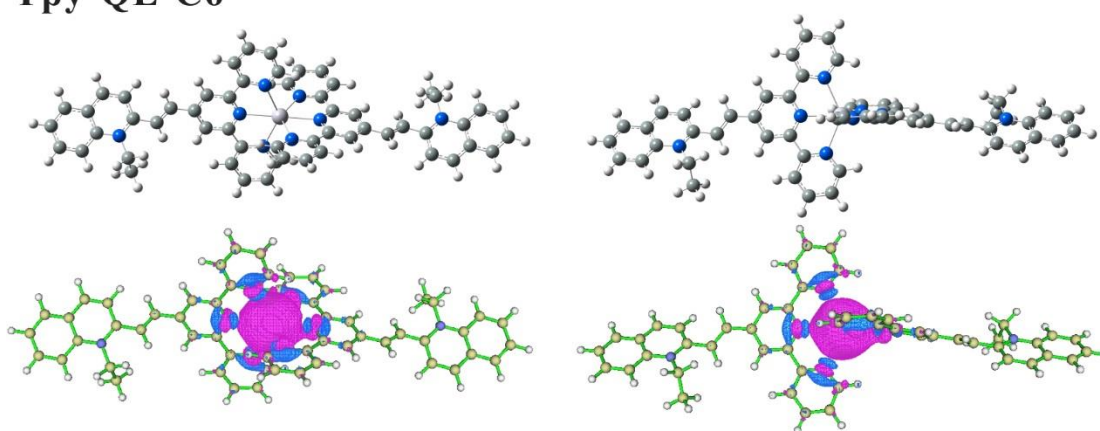

### Tpy-QL-Fe<sup>3+</sup>

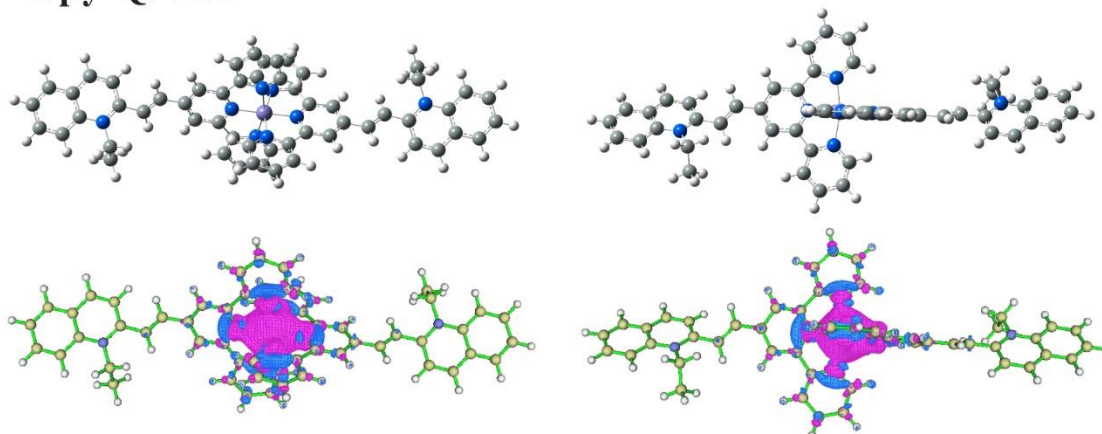

**Figure S8.** (up) Different observation view of DFT calculated optimization Tpy-QL-Fe<sup>2+</sup> Tpy-QL-Co<sup>2+</sup> and Tpy-QL-Fe<sup>3+</sup> structure. (down) Corresponding electron density changes before and after the Tpy-QL reaction with metal ions. The color blue area indicates electron density decreases after the reaction, the purple area indicates electron density increase.

**Table S1** Comparison of the detection limits for Co<sup>2+</sup> colorimetric sensors

| <b>Colorimetric sensors for Co<sup>2+</sup></b>       | <b>Detection limit/ppb</b> |
|-------------------------------------------------------|----------------------------|
| 2-Aminothiophenol (ATP) and copper nitrate system[3]  | 2350                       |
| Ag nanoparticles[4]                                   | 0.58                       |
| Dithizone based colorimetric chemosensor[5]           | 2.32                       |
| Ag-Au bimetallic nanoparticles[6]                     | 1.16                       |
| Sensitive ligand embedded nano-conjugate adsorbent[7] | 0.19                       |
| Thiazole based ligands[8]                             | 40                         |
| Chrysoidine G chemosensor[9]                          | 100                        |
| Thiosulfate stabilized gold nanoparticles[10]         | 2.24                       |
| Tripodal amide ligand[11]                             | 582                        |
| <b>This work</b>                                      | <b>0.34</b>                |

**Table S2** Comparison of the detection limits for Hg<sup>2+</sup> colorimetric sensors

| <b>Colorimetric sensors for Hg<sup>2+</sup></b>             | <b>Detection limit/ppb</b> |
|-------------------------------------------------------------|----------------------------|
| Protein-functionalized gold nanoparticles.[12]              | 40                         |
| BSA-stabilized Pt nanozyme[13]                              | 1.44                       |
| Chitosan-functionalized gold nanoparticles[14]              | 270                        |
| Label-free anisotropic nanogolds[15]                        | 6                          |
| Hydrophilic cycloruthenated complex[16]                     | 118                        |
| AIE-Based Chemodosimeter[17]                                | 120                        |
| gold nanoparticles[18]                                      | 100                        |
| Colloidal Ag Nanocrystals[19]                               | 40                         |
| Benzothiazole based colorimetric chemosensor[20]            | 102                        |
| Carbon nanodots as enzyme mimics[21]                        | 4.6                        |
| Benzothiazole based colorimetric sensors[22]                | 80                         |
| Hg <sup>2+</sup> -modulated G-quadruplex-based DNAzymes[23] | 10                         |
| Silver nanoparticles [24]                                   | 3.4                        |
| <b>This work</b>                                            | <b>6.51</b>                |

**Table S3** Comparison of the detection limits for Fe<sup>2+</sup> colorimetric sensors

| Colorimetric sensors for Fe <sup>2+</sup>          | Detection limit/ppb |
|----------------------------------------------------|---------------------|
| Electrospun nanofiber based colorimetric probe[25] | 102                 |
| Dipicolylamine based sensor[26]                    | 128                 |
| Hydrazinyl-4-(trifluoromethyl)pyrimidine[27]       | 21.1                |
| Imidazole-based chemosensor[28]                    | 17.9                |
| 8-Hydroxyjulolidine-9-carboxaldehyde[29]           | 64.4                |
| Benzimidazole-based chemosensor[30]                | 66.1                |
| 2,3-Dihydroxybenzaldehyde[31]                      | 30.8                |
| TiO <sub>2</sub> based screen-printed material[32] | 300                 |
| Schiff base based sensors based chemosensor [33]   | 7.84                |
| Luminescent molybdenum disulfide nanosheet[34]     | 0.39                |
| Sensor based on plasmonic response[35]             | 30.2                |
| <b>This work</b>                                   | <b>0.49</b>         |

**Table S4** Comparison of the detection limits for Fe<sup>3+</sup> colorimetric sensors

| Colorimetric sensors for Fe <sup>3+</sup>                | Detection limit/ppb |
|----------------------------------------------------------|---------------------|
| Imidazole-based chemosensor[28]                          | 15.1                |
| 8-Hydroxyjulolidine-9-carboxaldehyde based sensor[29]    | 28.6                |
| Benzimidazole-based chemosensor[30]                      | 67.8                |
| Anionic poly(3,4-propylenedioxythiophene) derivative[36] | 1.29                |
| 2,3-Dihydroxybenzaldehyde-based chemosensor [31]         | 14.0                |
| 1,8-Naphthalimide chemosensor[37]                        | 384.2               |
| Functionalized silver nanoparticles[38]                  | 356.1               |
| Naphthalenediimide based colorimetric probe[39]          | 5.6                 |
| Catalytic oxidation of gold nanoparticles[40]            | 47.6                |
| Phenol-based BODIPY chemosensor[41]                      | 7.84                |
| Pyrophosphate functionalized gold nanoparticles.[42]     | 313.6               |
| <b>This work</b>                                         | <b>1.01</b>         |

**Table S5** The structural parameters of coordination bond in the complex of Tpy-QL-M<sup>n+</sup>

| Complex                 | Bond angle of N-M-N(°) | Bond lengths of N-M (Å) | Angle of two Tpy-QL (°) |
|-------------------------|------------------------|-------------------------|-------------------------|
| Tpy-QL-Hg <sup>2+</sup> | 81.55                  | 1.97                    | 91.28                   |
| Tpy-QL-Fe <sup>3+</sup> | 80.78                  | 1.99                    | 91.48                   |
| Tpy-QL-Fe <sup>2+</sup> | 79.89                  | 1.92                    | 91.76                   |
| Tpy-QL-Co <sup>2+</sup> | 73.88                  | 2.07                    | 94.71                   |



## <sup>1</sup>H NMR and HRMS data for obtained compounds

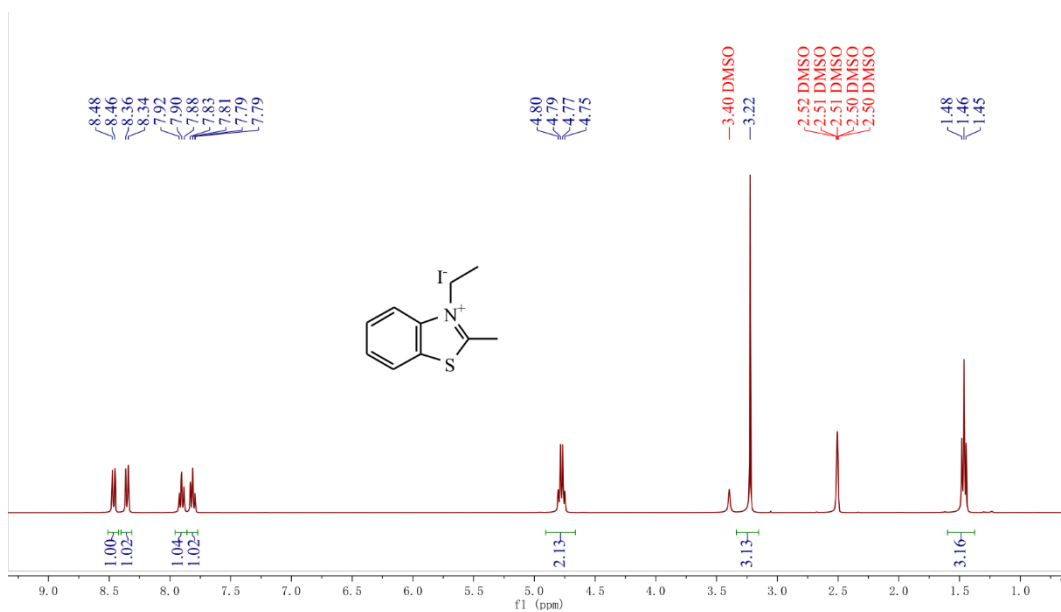

Figure S9. <sup>1</sup>H NMR of *N*-ethyl-2-methyl-benzothiazolium iodide in *d*<sub>6</sub>-DMSO.

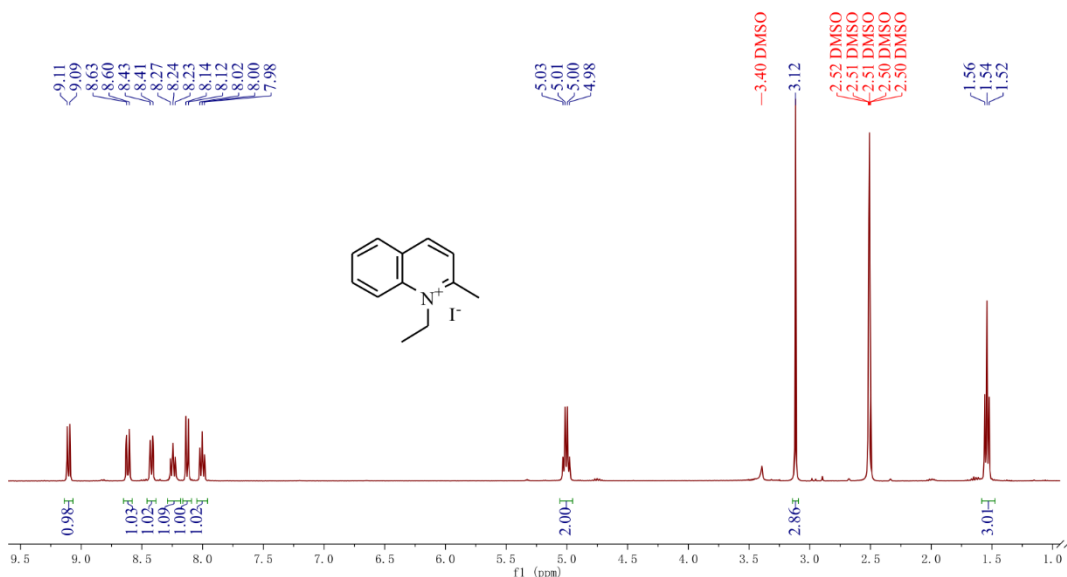

Figure S10. <sup>1</sup>H NMR of *N*-ethyl-2-methyl-quinolinium iodide in *d*<sub>6</sub>-DMSO.

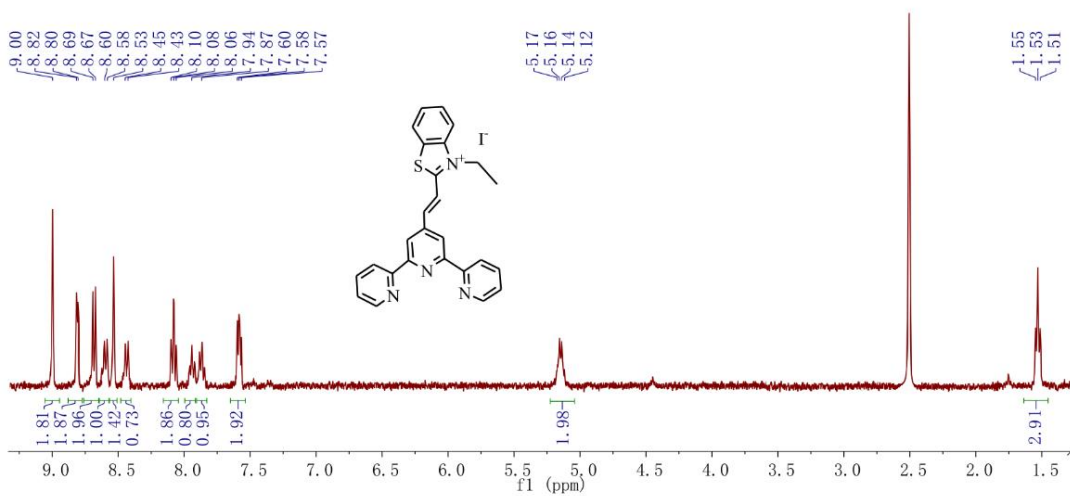

Figure S11.  $^1\text{H}$  NMR of Tpy-BZ in  $d_6$ -DMSO.

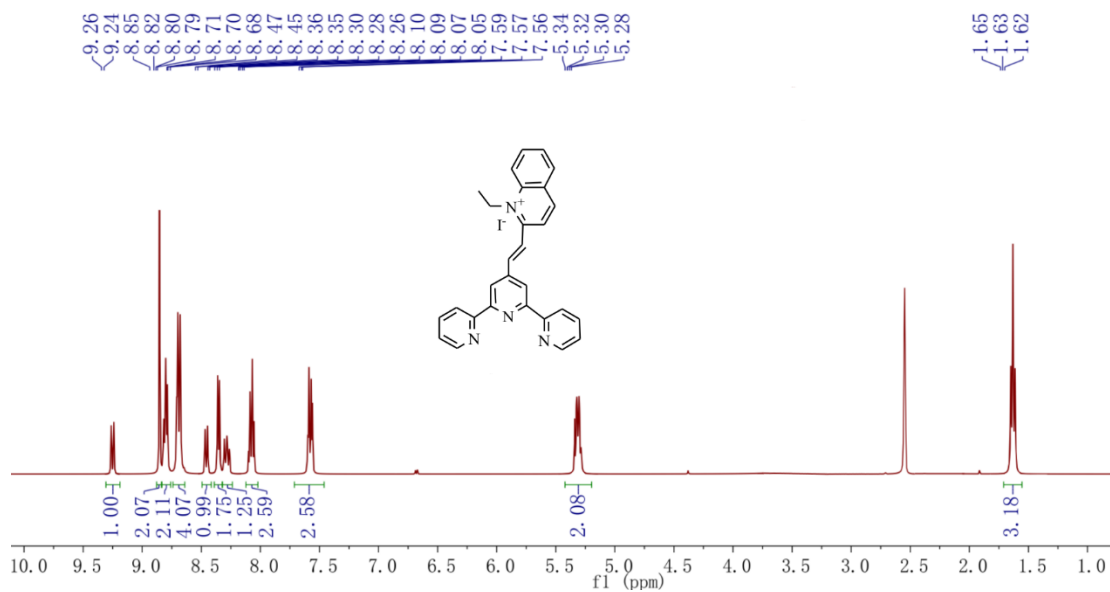

Figure S12.  $^1\text{H}$  NMR of Tpy-QL in  $d_6$ -DMSO.

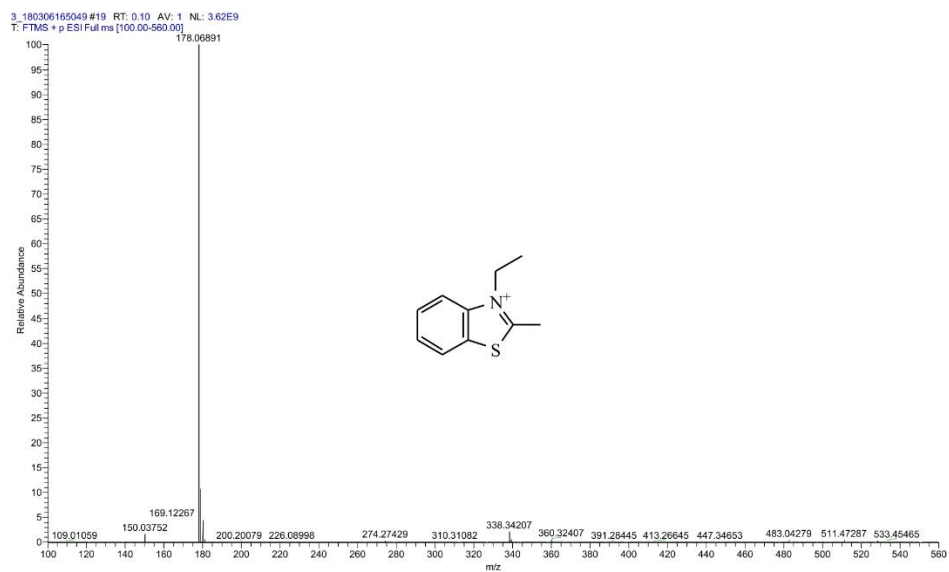

**Figure S13.** HRMS (m/z) analysis of the *N*-ethyl-2-methyl-benzothiazolium (calcd for  $C_{10}H_{12}NS [M-I]^+$  178.06788, found, 178.06891).

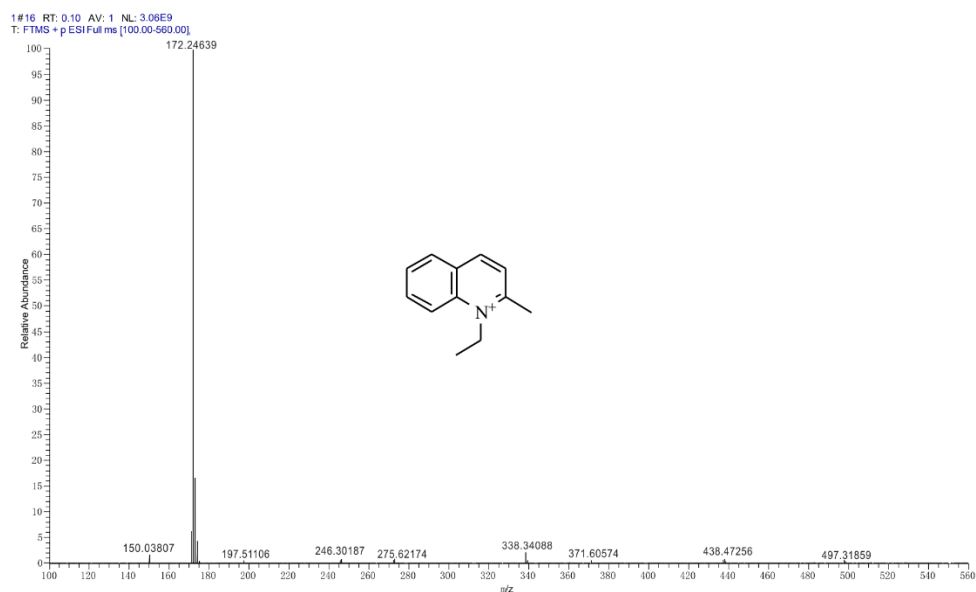

**Figure S14.** HRMS (m/z) analysis of the *N*-ethyl-2-methyl-quinolinium (calcd for  $C_{12}H_{14}N [M-I]^+$  172.24688, found, 172.24639).

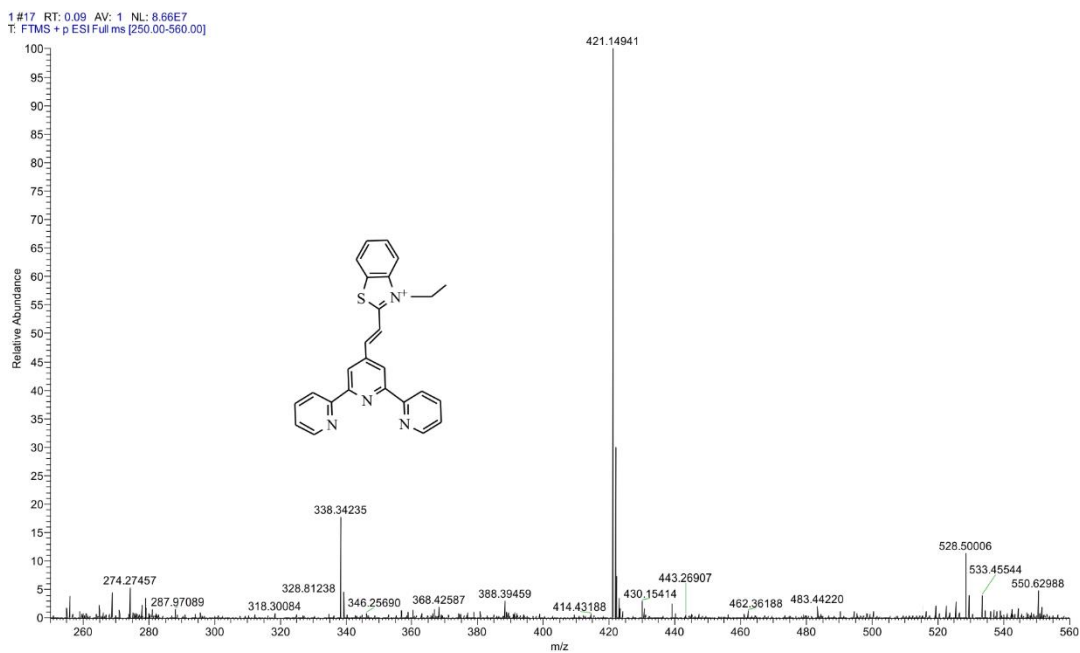

**Figure S15.** HRMS (m/z) analysis of Tpy-BZ (calcd for  $C_{26}H_{21}N_4S$   $[M-I]^+$  421.14814, found, 421.14941).

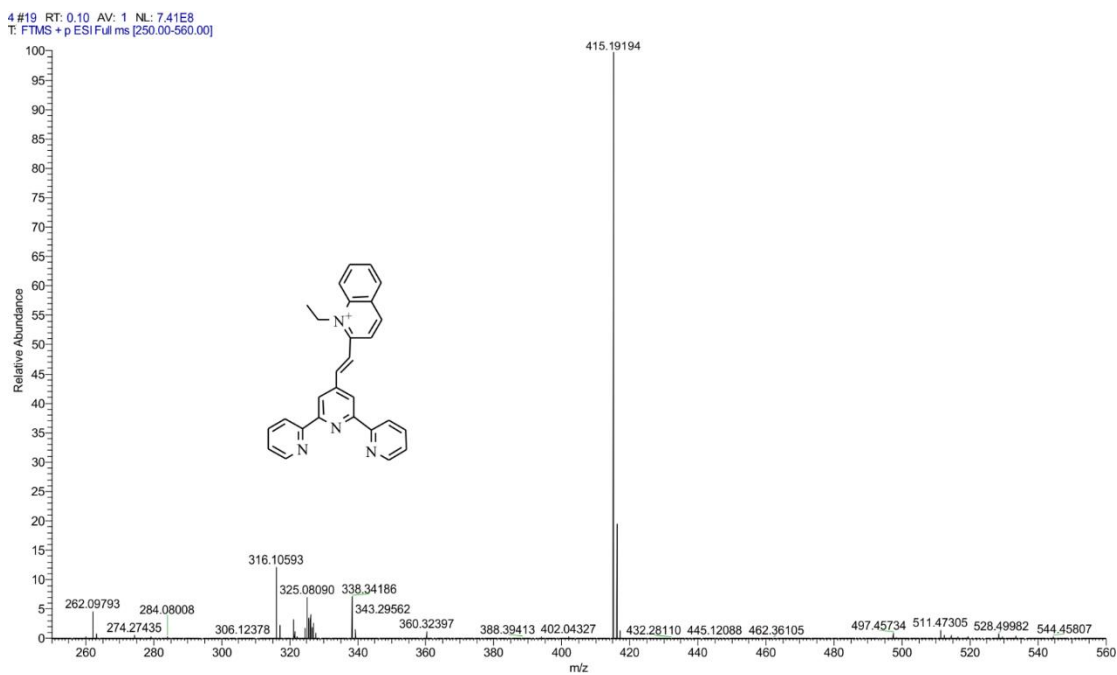

**Figure S16.** HRMS (m/z) analysis of the Tpy-QL (calcd for  $C_{28}H_{23}N_4$   $[M-I]^+$  415.19172, found, 415.19194).

## References

1. I.D. Kuntz, F.P. Gasparro, M.D. Johnston, R.P. Taylor, Molecular interactions and the Benesi-Hildebrand Equation, *J. Am. Chem. Soc.* **1968**, *90*, 4778-4781.
2. H.A. Benesi, J.H. Hildebrand, A Spectrophotometric Investigation of the Interaction of Iodine with Aromatic Hydrocarbons, *J. Am. Chem. Soc.* **1949**, *71*, 2703-2707
3. Z. Liu, X. Jia, P. Bian, Z. Ma, A simple and novel system for colorimetric detection of cobalt ions, *Analyst* **2013**, *139*, 585-588.
4. T. Wu, Z. Ma, Colorimetric Detection of Cobalt or Nickel Ions Based on the Change of the Catalytic Performance of Leached Ag Nanoparticles, *J. Nanosci. Nanotechnol.* **2017**, *17*, 4297-4303.
5. H. Tavallali, G. Deilamy-Rad, A. Parhami, S.Z. Mousavi, A novel development of dithizone as a dual-analyte colorimetric chemosensor: Detection and determination of cyanide and cobalt(II) ions in dimethyl sulfoxide/water media with biological applications, *J Photochem. Photobiol. B* **2013**, *125*, 121-130.
6. D. Xu, H. Chen, Q. Lin, Z. Li, T. Yang, Z. Yuan, Selective and sensitive colorimetric determination of cobalt ions using Ag-Au bimetallic nanoparticles, *RSC Adv.* **2017**, *7*, 16295-16301.
7. M.R. Awwal, T. Yaita, H. Shiwaku, S. Suzuki, A sensitive ligand embedded nano-conjugate adsorbent for effective cobalt(II) ions capturing from contaminated water, *Chem. Eng. J.* **2015**, *276*, 1-10.
8. D. Singhal, A.K. Singh, A. Upadhyay, Highly selective potentiometric and colorimetric determinations of cobalt (II) ion using thiazole based ligands, *Mat. Sci. Eng. C-Mater.* **2014**, *45*, 216-224.
9. S.M. Kang, S.C. Jang, G.Y. Kim, C.S. Lee, S.H. Yun, C. Roh, A Rapid In Situ Colorimetric Assay for Cobalt Detection by the Naked Eye, *Sensors* **2016**, *16*, 626.
10. Z. Zhang, J. Zhang, T. Lou, D. Pan, L. Chen, C. Qu, Z. Chen, Label-free colorimetric sensing of cobalt(II) based on inducing aggregation of thiosulfate stabilized gold nanoparticles in the presence of ethylenediamine, *Analyst* **2011**, *137*, 400-405.
11. Z. JR, L. DP, H. Y, K. XJ, Z. ZM, R. YP, L. LS, H. RB, Z. LS, A highly selective colorimetric chemosensor for cobalt(II) ions based on a tripodal amide ligand, *Dalton T.* **2014**, *43*, 11579-11586.
12. Y. Guo, Z. Wang, W. Qu, H. Shao, X. Jiang, Colorimetric detection of mercury, lead and copper ions simultaneously using protein-functionalized gold nanoparticles, *Biosens. Bioelectron.* **2011**, *26*, 4064-4069.
13. W. Li, B. Chen, H. Zhang, Y. Sun, J. Wang, J. Zhang, Y. Fu, BSA-stabilized Pt nanozyme for peroxidase mimetics and its application on colorimetric detection of mercury(II) ions, *Biosens. Bioelectron.* **2015**, *66*, 251-258.
14. Z. Chen, C. Zhang, Y. Tan, T. Zhou, H. Ma, C. Wan, Y. Lin, K. Li, Chitosan-functionalized gold nanoparticles for colorimetric detection of mercury ions based on chelation-induced aggregation, *Microchim. Acta* **2015**, *182*, 611-616.
15. L.H. Jin, C.S. Han, Eco-friendly colorimetric detection of mercury(II) ions using label-free anisotropic nanogolds in ascorbic acid solution, *Sens. Actuators, B* **2014**, *195*, 239-245.
16. X. Li, X. Su, Z. Shi, X. Cheng, S. Liu, Q. Zhao, Highly selective and reversible colorimetric detection of mercury ions by a hydrophilic cycloruthenated complex in water, *Sens. Actuators, B* **2014**, *201*, 343-350.
17. A. Chatterjee, M. Banerjee, D.G. Khandare, R.U. Gawas, S.C. Mascarenhas, A. Ganguly, R. Gupta, H. Joshi, Aggregation-Induced Emission-Based Chemodosimeter Approach for Selective Sensing and Imaging of Hg(II) and Methylmercury Species, *Anal. Chem.* **2017**, *89*, 12698-12704.
18. N. Kanayama, T. Takarada, M. Maeda, Rapid naked-eye detection of mercury ions based on non-crosslinking aggregation of double-stranded DNA-carrying gold nanoparticles, *Chem. Commun.* **2011**, *47*, 2077-2079.

19. S. Liu, H. Yang, X. Zhao, Y. Ren, D. Li, L. Zhang, R. Xing, Microwave-Assisted Synthesis of Colloidal Ag Nanocrystals and Colorimetric Detection of Mercury (I and II) Ions in Aqueous Solution, *J. Nanosci. Nanotechnol.* **2016**, *16*, 12326-12331.
20. B.K. Momidi, V. Tekuri, D.R. Trivedi, Selective detection of mercury ions using benzothiazole based colorimetric chemosensor, *Inorganic Chem. Commun.* **2016**, *74*, 1-5.
21. Z. Mohammadpour, A. Safavi, M. Shamsipur, A new label free colorimetric chemosensor for detection of mercury ion with tunable dynamic range using carbon nanodots as enzyme mimics, *Chem. Eng. J.* **2014**, *255*, 1-7.
22. A.K. Mahapatra, R. Maji, P. Sahoo, P.K. Nandi, S.K. Mukhopadhyay, A. Banik, A new colorimetric chemodosimeter for mercury ion via specific thioacetal deprotection in aqueous solution and living cells, *Tetrahedron Lett.* **2012**, *53*, 7031-7035.
23. T. Li, S. Dong, E. Wang, Label-free colorimetric detection of aqueous mercury ion  $Hg^{2+}$  using  $Hg^{2+}$ -modulated G-quadruplex-based DNAzymes, *Anal. Chem.* **2009**, *81*, 2144.
24. Y. Wang, F. Yang, X. Yang, Colorimetric detection of mercury(II) ion using unmodified silver nanoparticles and mercury-specific oligonucleotides, *ACS Appl. Mater. Inter.* **2010**, *2*, 339.
25. D.A. Ondigo, Z.R. Tshentu, N. Torto, Electrospun nanofiber based colorimetric probe for rapid detection of  $Fe^{2+}$  in water, *Anal. Chim. Acta* **2013**, *804*, 228-234.
26. H. Kim, Y.J. Na, E.J. Song, K.B. Kim, J.M. Bae, C. Kim, A single colorimetric sensor for multiple target ions: the simultaneous detection of  $Fe^{2+}$  and  $Cu^{2+}$  in aqueous media, *RSC Adv.* **2014**, *4*, 22463-22469.
27. J.M. Jung, S.Y. Lee, C. Kim, A novel colorimetric chemosensor for multiple target metal ions  $Fe^{2+}$ ,  $Co^{2+}$  and  $Cu^{2+}$  in a near-perfect aqueous solution: Experimental and theoretical studies, *Sens. Actuators, B* **2017**, *251*, 291-301.
28. T.G. Jo, K.H. Bok, J. Han, H.L. Mi, C. Kim, Colorimetric detection of  $Fe^{3+}$  and  $Fe^{2+}$  and sequential fluorescent detection of  $Al^{3+}$  and pyrophosphate by an imidazole-based chemosensor in a near-perfect aqueous solution, *Dyes Pigments* **2017**, *139*, 136-147.
29. H. Jung, H. Mi, highly selective colorimetric chemosensor for sequential detection of  $Fe^{3+}$  and pyrophosphate in aqueous solution, *Tetrahedron* **2017**, *73*, 6624-6631.
30. S.K. Yong, J.J. Lee, Y.L. Sun, T.G. Jo, C. Kim, A highly sensitive benzimidazole-based chemosensor for the colorimetric detection of  $Fe(II)$  and  $Fe(III)$  and the fluorometric detection of  $Zn(II)$  in aqueous media, *RSC Adv.* **2016**, *6*, 61505-61515
31. S.Y. Kim, S.Y. Lee, H.K. Ji, S.K. Min, A. Kim, C. Kim, Colorimetric detection of  $Fe^{3+/2+}$  and fluorescent detection of  $Al^{3+}$  in aqueous media: applications and DFT calculations, *J. Coord. Chem.* **2018**, *6*, 1-21.
32. N.O. Laschuk, I.I. Ebralidze, S. Quaranta, S.T.W. Kerr, J.G. Egan, S. Gillis, F. Gaspari, A. Latini, O.V. Zenkina, Rational design of a material for rapid colorimetric  $Fe^{2+}$  detection, *Mater. Design.* **2016**, *107*, 18-25.
33. K.B. Kim, G.J. Park, H. Kim, E.J. Song, J.M. Bae, C. Kim, A novel colorimetric chemosensor for multiple target ions in aqueous solution: simultaneous detection of  $Mn(II)$  and  $Fe(II)$ , *Inorg. Chem. Commun.* **2014**, *46*, 237-240.
34. Y. Wang, J. Hu, Q. Zhuang, Y. Ni, Enhancing sensitivity and selectivity in a label-free colorimetric sensor for detection of iron(II) ions with luminescent molybdenum disulfide nanosheet-based peroxidase mimetics, *Biosens. Bioelectron.* **2016**, *80*, 111-117.
35. S. Basiri, A. Mehdinia, A. Jabbari, A sensitive triple colorimetric sensor based on plasmonic response quenching of green synthesized silver nanoparticles for determination of  $Fe^{2+}$ , hydrogen peroxide, and glucose, *Colloid.*

*Surface. A* **2018**, *545*, 138-146.

36. X. Chen, Q. Zhao, W. Zou, Q. Qu, F. Wang, A colorimetric Fe<sup>3+</sup> sensor based on an anionic poly(3,4-propylenedioxythiophene) derivative, *Sens. Actuators, B* **2017**, *244*, 891-896.
37. Z. Zhang, S. Lu, C. Sha, D. Xu, A single thiourea-appended 1,8-naphthalimide chemosensor for three heavy metal ions: Fe<sup>3+</sup>, Pb<sup>2+</sup> and Hg<sup>2+</sup>, *Sens. Actuators, B* **2015**, *208*, 258-266.
38. S. Bothra, J.N. Solanki, S.K. Sahoo, J.F. Callan, Anion-driven selective colorimetric detection of Hg<sup>2+</sup> and Fe<sup>3+</sup> using functionalized silver nanoparticles, *RSC Adv.* **2013**, *4*, 1341-1346.
39. N.V. Ghule, R.S. Bhosale, A.L. Puyad, S.V. Bhosale, S.V. Bhosale, Naphthalenediimide amphiphile based colorimetric probe for recognition of Cu<sup>2+</sup> and Fe<sup>3+</sup> ions, *Sens. Actuators, B* **2016**, *227*, 17-23.
40. J. Li, X. Wang, D. Huo, C. Hou, H. Fa, M. Yang, L. Zhang, Colorimetric measurement of Fe<sup>3+</sup> using a functional paper-based sensor based on catalytic oxidation of gold nanoparticles, *Sens. Actuators, B* **2017**, *242*, 1265-1271.
41. L. Wang, G. Fang, D. Cao, A novel phenol-based BODIPY chemosensor for selective detection Fe<sup>3+</sup> with colorimetric and fluorometric dual-mode, *Sens. Actuators, B* **2015**, *207*, 849-857.
42. S. Wu, Y. Chen, Y. Sung, Colorimetric detection of Fe<sup>3+</sup> ions using pyrophosphate functionalized gold nanoparticles, *Analyst* **2011**, *136*, 1887-1891.
